# Supplementary material
Source: publisher site journal article supplement (https://www.spandidos-publications.com/5284/downloadSupplementary)
Supplement: Supplementary file 1 [file downloadSupplementary]

## Sheet: lncRNA-liver cancer miRNA
Table SV. Relationships of ST8SIA6-AS1 and LINC01093 with 8 liver cancer-associated miRNAs.
lncRNA	miRNA	MitScore
LINC01093	hsa-miR-125a-3p	0.714706
LINC01093	hsa-miR-129-5p	0.618493
LINC01093	hsa-miR-145-5p	0.862279
LINC01093	hsa-miR-200a-5p	0.646233
LINC01093	hsa-miR-221-3p	0.706252
ST8SIA6-AS1	hsa-miR-125a-3p	0.739578
ST8SIA6-AS1	hsa-miR-126-5p	0.654938
ST8SIA6-AS1	hsa-miR-129-5p	0.741463
ST8SIA6-AS1	hsa-miR-145-5p	0.770233
ST8SIA6-AS1	hsa-miR-186-5p	0.734317
ST8SIA6-AS1	hsa-miR-9-5p	0.951147
lncRNA, long non-coding RNA; miRNA, microRNA.
